# Supplementary material for: MicroRNA-200 and microRNA-30 family as prognostic molecular signatures in ovarian cancer: A meta-analysis
Source: PubMed Central journal article supplement (PMC6133642; doi:10.1097/md.0000000000011505), 2018-08-10

**Supplementary Table 1. Reporting recommendations for tumour marker prognostic studies (REMARK)**

| Items                                                           | Authors     |            |         |            |         |    |                     |         |         |              |    |
|-----------------------------------------------------------------|-------------|------------|---------|------------|---------|----|---------------------|---------|---------|--------------|----|
|                                                                 | Bagno<br>li | Calur<br>a | Ca<br>o | Elgae<br>n | Ga<br>o | Hu | Kapetan<br>ak<br>is | Le<br>e | Leskelä | Marchi<br>ni | Me |
| <b>Introduction</b>                                             |             |            |         |            |         |    |                     |         |         |              |    |
| 1.objectives and hypotheses                                     | √           |            | √       | √          | √       | √  |                     | √       | √       | √            | √  |
| <b>Materials and Methods</b>                                    |             |            |         |            |         |    |                     |         |         |              |    |
| <b>Patients</b>                                                 |             |            |         |            |         |    |                     |         |         |              |    |
| 2.characteristics                                               | √           | √          | √       | √          | √       | √  | √                   | √       | √       | √            | √  |
| 3.treatment methods                                             | √           |            |         |            |         |    |                     |         |         |              |    |
| <b>Specimen characteristics</b>                                 |             |            |         |            |         |    |                     |         |         |              |    |
| 4.biological material                                           | √           | √          | √       | √          | √       | √  | √                   | √       | √       | √            | √  |
| <b>Assay methods</b>                                            |             |            |         |            |         |    |                     |         |         |              |    |
| 5. method protocol                                              | √           |            | √       | √          | √       |    | √                   | √       | √       | √            | √  |
| <b>Study design</b>                                             |             |            |         |            |         |    |                     |         |         |              |    |
| 6.method of case selection                                      | √           | √          | √       | √          | √       | √  | √                   | √       | √       | √            | √  |
| 7.define clinical and points examined                           | √           | √          | √       | √          | √       | √  | √                   | √       | √       | √            | √  |
| 8.candidate variable                                            | √           |            |         |            |         |    |                     |         |         |              |    |
| 9.sample size                                                   | √           | √          | √       | √          | √       | √  | √                   | √       | √       | √            | √  |
| <b>Statistical analysis methods</b>                             |             |            |         |            |         |    |                     |         |         |              |    |
| 10.statistical methods                                          | √           | √          | √       | √          | √       | √  | √                   | √       | √       | √            | √  |
| 11.cutpoint                                                     | √           | √          | √       | √          | √       | √  | √                   | √       | √       | √            | √  |
| <b>Results</b>                                                  |             |            |         |            |         |    |                     |         |         |              |    |
| <b>Data</b>                                                     |             |            |         |            |         |    |                     |         |         |              |    |
| 12.number of patients                                           | √           | √          | √       | √          | √       | √  | √                   | √       | √       | √            | √  |
| 13.demographic characteristics                                  | √           | √          | √       | √          | √       | √  | √                   | √       | √       | √            | √  |
| <b>Analysis and presentation</b>                                |             |            |         |            |         |    |                     |         |         |              |    |
| 14. the relation of the marker to standard prognostic variables | √           | √          | √       | √          | √       | √  | √                   | √       | √       | √            | √  |
| 15.univariate analyses                                          | √           | √          | √       | √          | √       | √  | √                   | √       | √       | √            | √  |
| 16.multivariable                                                | √           | √          | √       |            |         |    | √                   | √       |         | √            | √  |

|                                      |   |   |   |   |   |   |   |   |   |   |   |
|--------------------------------------|---|---|---|---|---|---|---|---|---|---|---|
| analyses                             |   |   |   |   |   |   |   |   |   |   |   |
| 17. effects and confidence intervals | √ | √ | √ |   | √ |   | √ | √ | √ | √ | √ |
| 18. further investigations           |   |   |   |   |   | √ |   |   |   |   | √ |
| <b>Discussion</b>                    |   |   |   |   |   |   |   |   |   |   |   |
| 19. interpret the results            | √ | √ | √ | √ | √ | √ | √ | √ | √ | √ | √ |
| 20. implications for future research | √ | √ |   | √ | √ | √ |   | √ | √ | √ | √ |

---

**Supplementary Figure 1. Forest plot showing the combined HR from included studies for the association between the expression levels of miR-200 family and OS. OS = overall survival.**

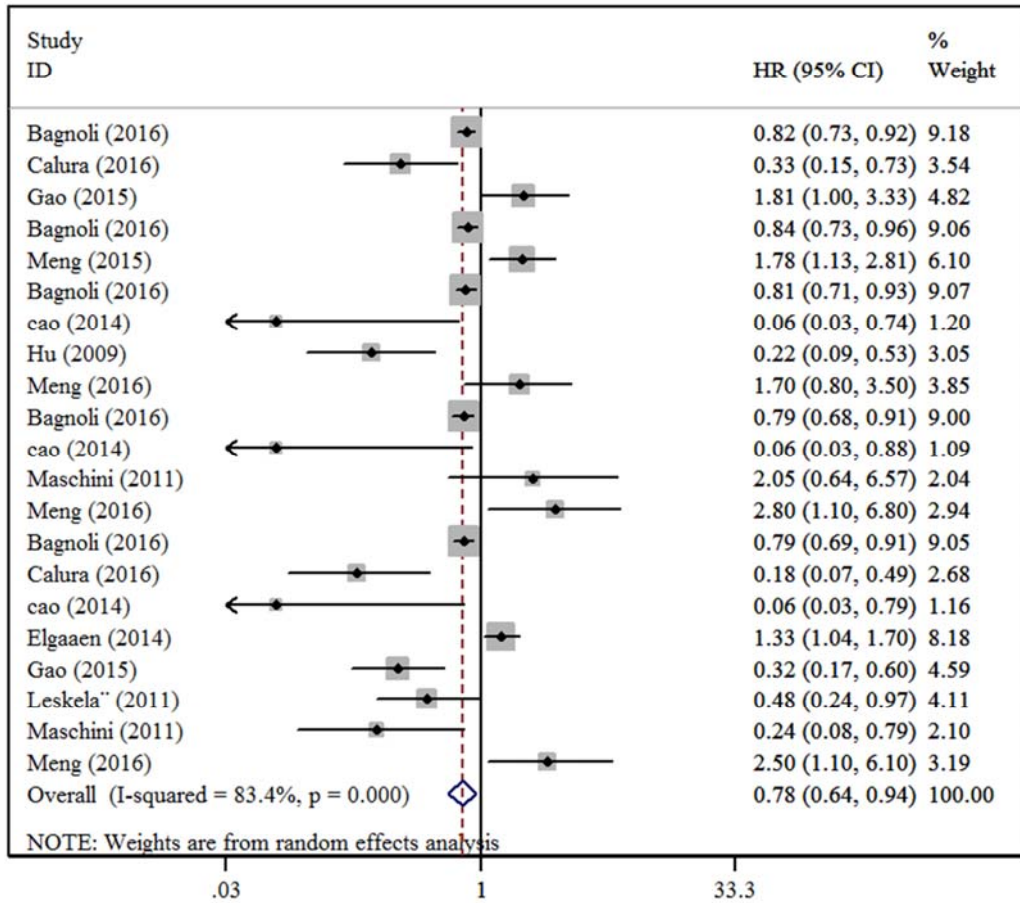

**Supplementary Figure 2. Sensitivity analyses of studies regarding miR-200 family expression and OS. OS = overall survival.**

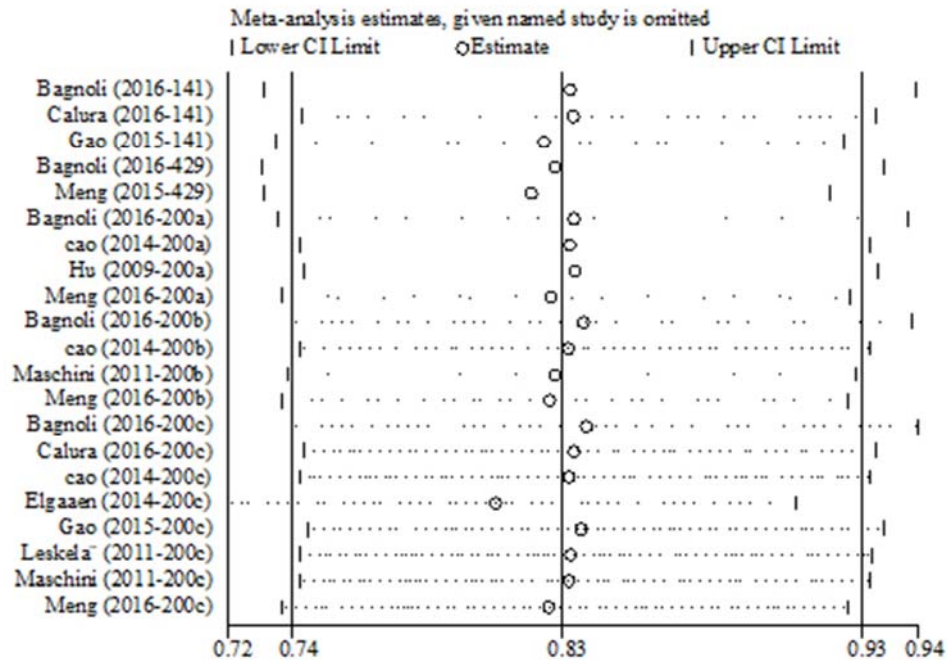

(A)

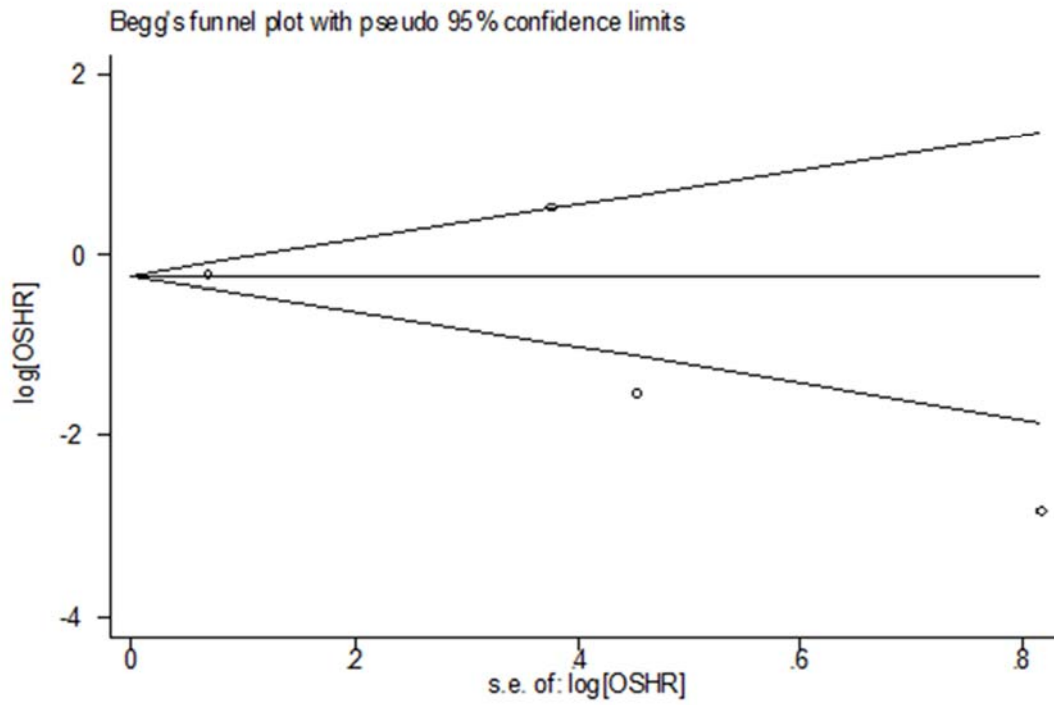

**Supplementary Figure 3. Begg's funnel plot of standard error for assessing publication bias. A, miR-200a. B, miR-200b. C, miR-200c. D, miR-141.**

(B)

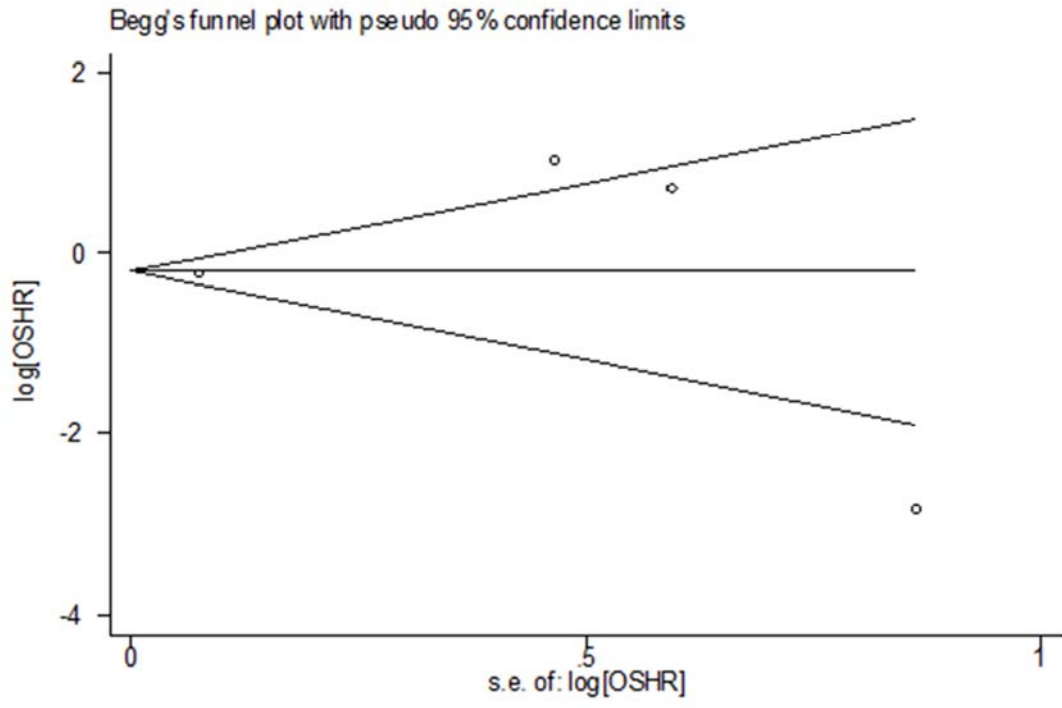

(C)

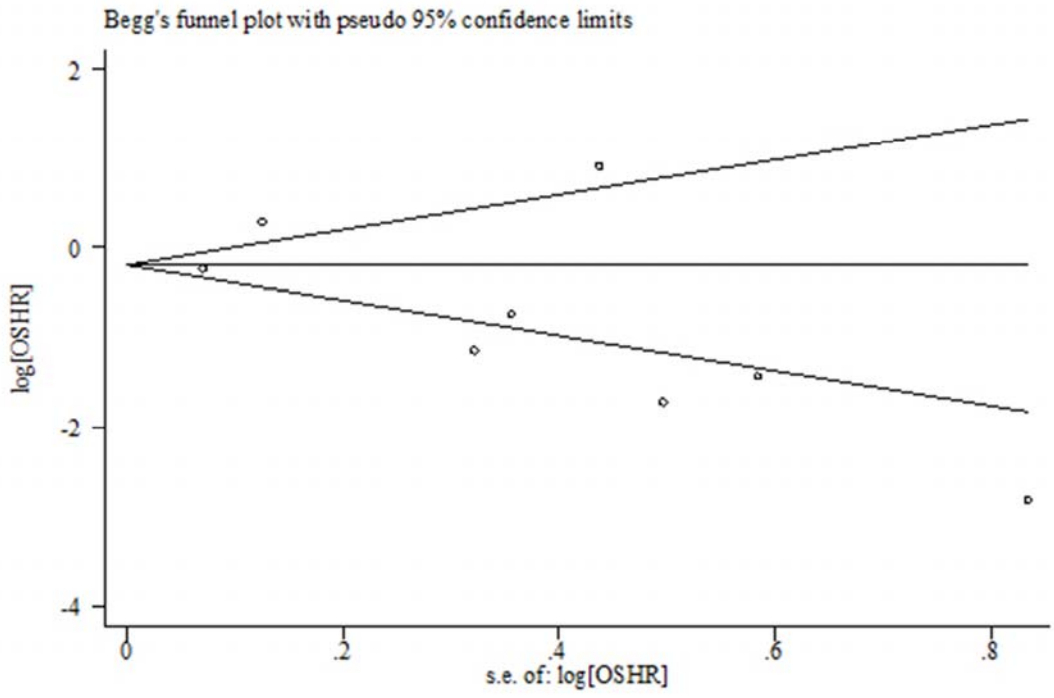

(D)

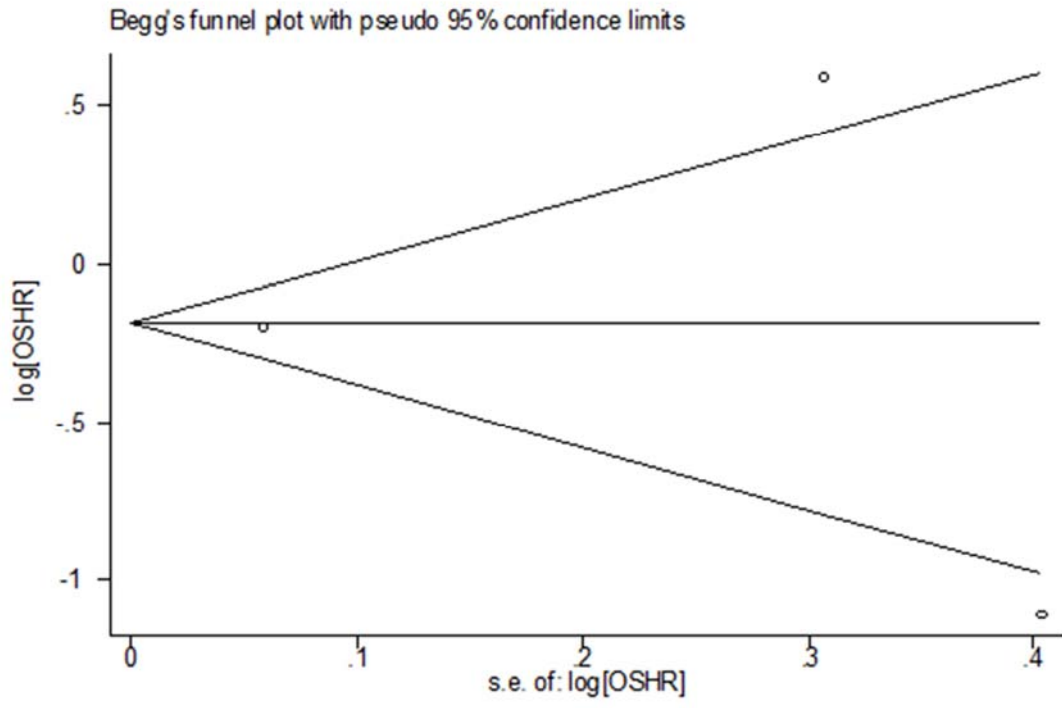

**Supplementary Figure 3. Begg's funnel plot of standard error for assessing publication bias. A, miR-200a. B, miR-200b. C, miR-200c. D, miR-141.**

**Supplementary Figure 4. Forest plots of subgroup analysis by study samples regarding the miR-200 family expression and OS of patients with ovarian cancer. A, the study samples were tissues. B, the study samples were blood.**

(A)

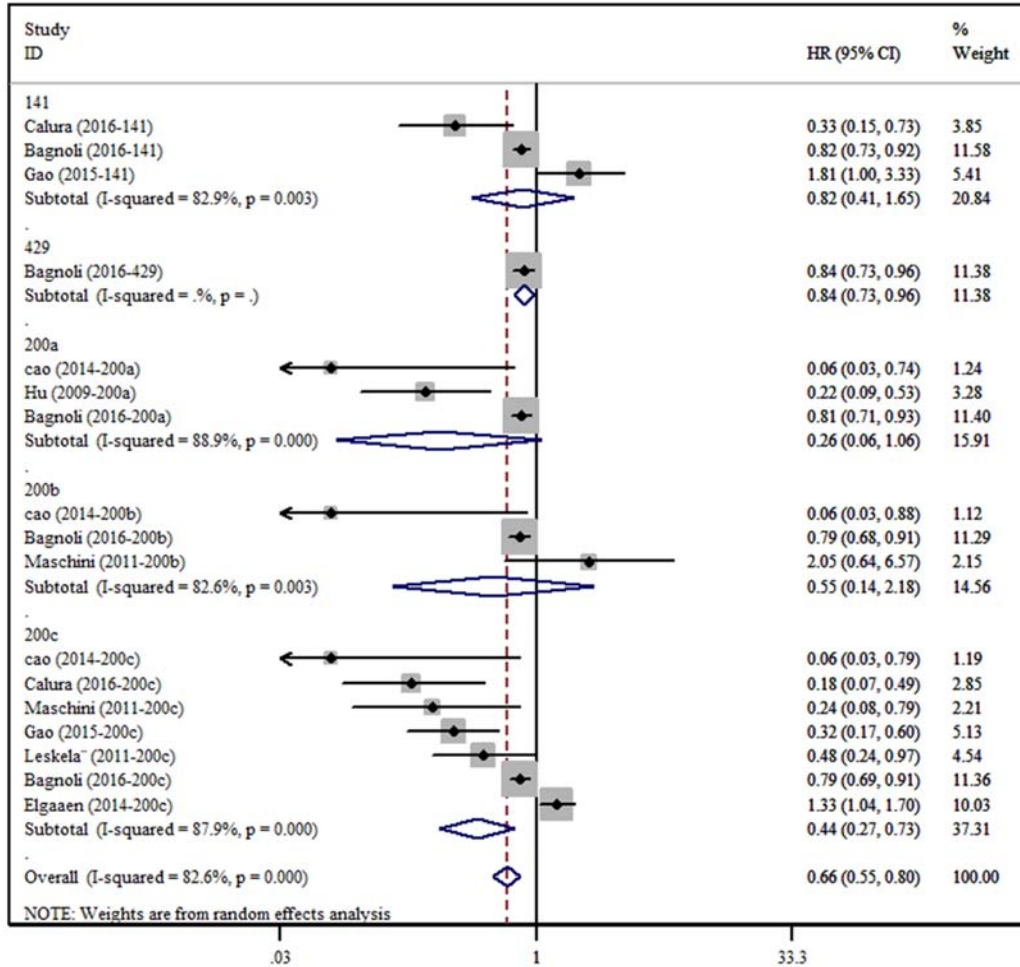

(B)





**Supplementary Figure 5. Forest plots of subgroup analysis by study kinds regarding the miR-200 family expression and OS of patients with ovarian cancer.** A, the study kinds were multivariate study. B, the study kinds were univariate study. C, divided miR-200 family into two clusters based on chromosomal location. OS = overall survival.

(A)

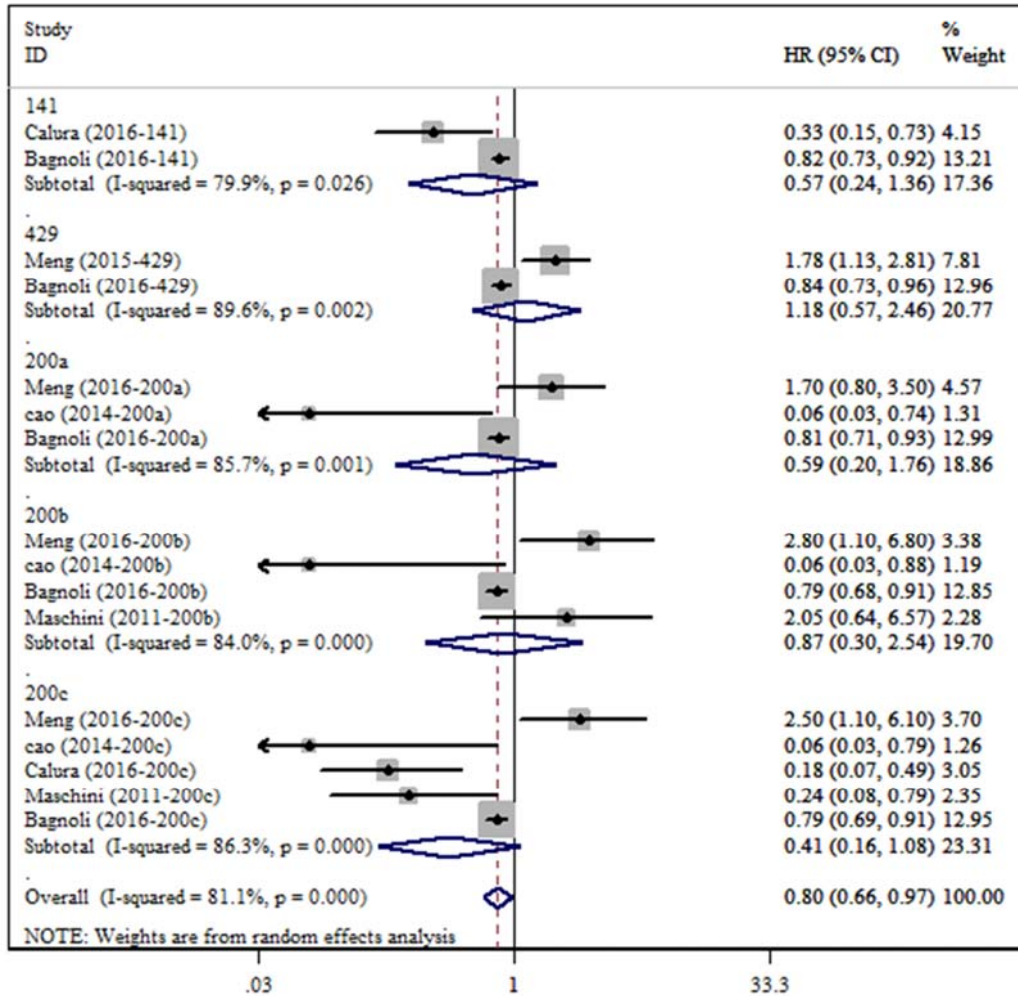

(B)

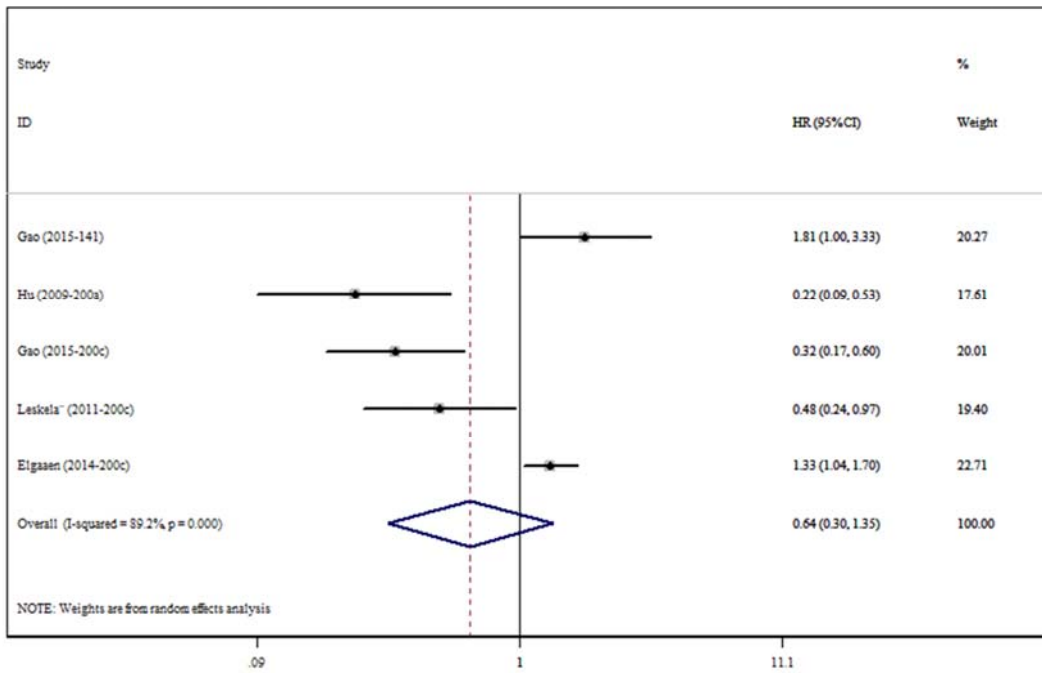

**Supplementary Figure 5. Forest plots of subgroup analysis by study kinds regarding the miR-200 family expression and OS of patients with ovarian cancer. A, the study kinds were multivariate study. B, the study kinds were univariate study. C, divided miR-200 family into two clusters based on chromosomal location. OS = overall survival.**

(C)

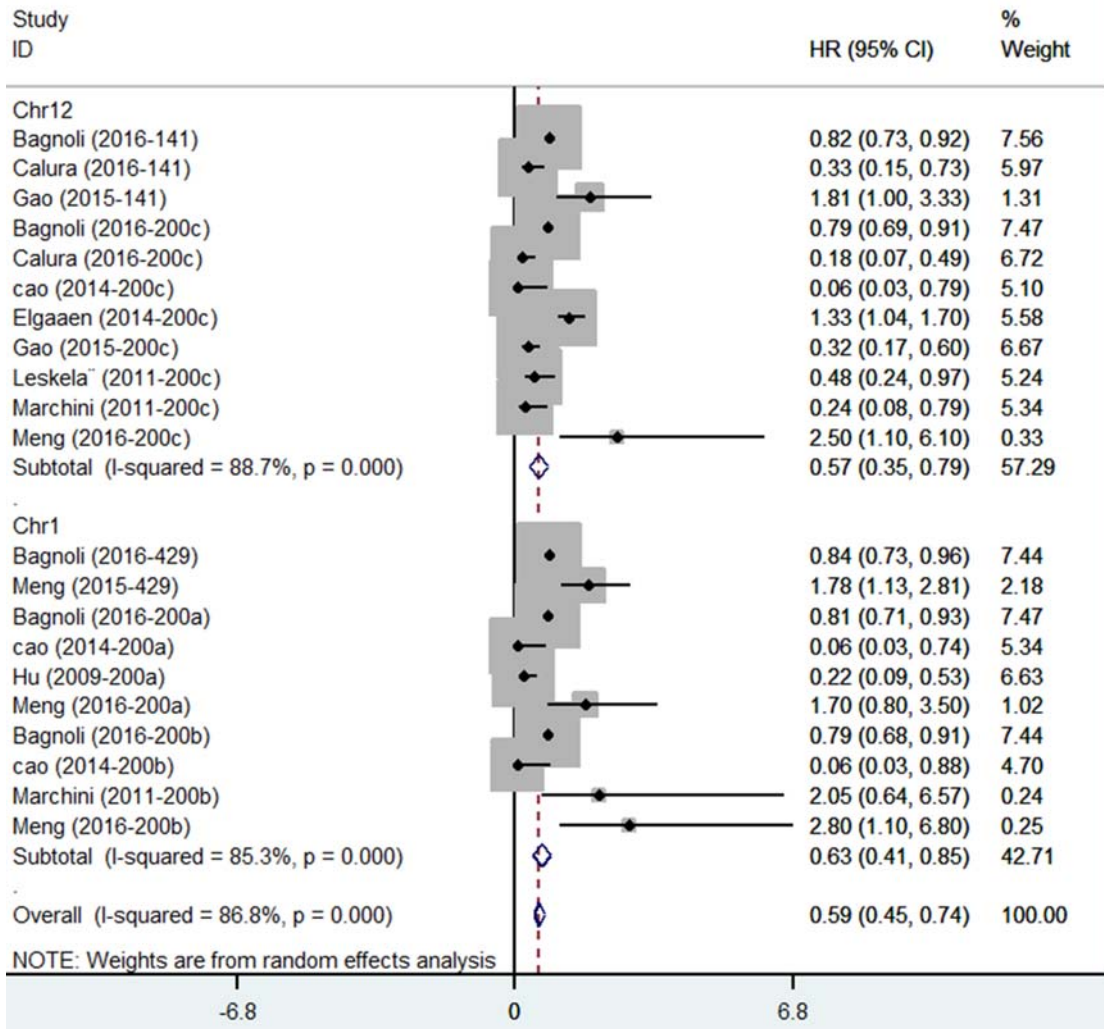

**Supplementary Figure 6. Forest plot showing the combined HR from included studies for the association between the expression levels of miR-200 family and PFS. PFS = progression free survival.**

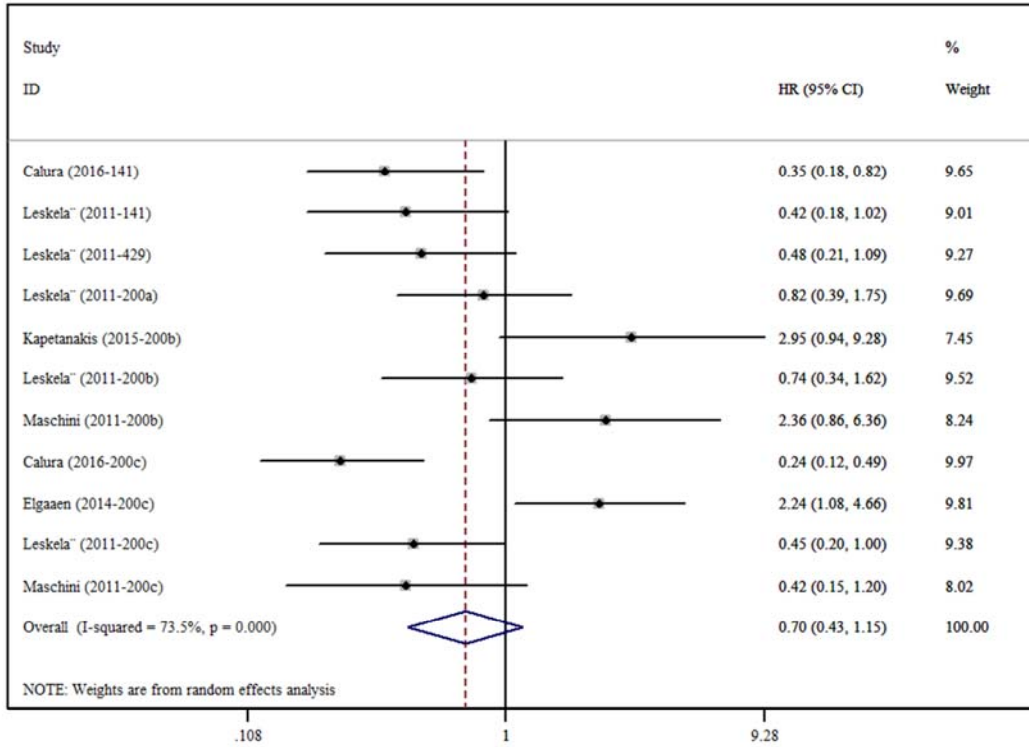

Supplement: medi-97-e11505-s001.pdf [file medi-97-e11505-s001.pdf]
